# Supplementary material for: Synthesis of peptide-nanotube platinum-nanoparticle composites
Source: Royal Society of Chemistry journal article supplement (doi:10.1039/b402126f), 2004-01-01
Supplement: b402126f.doc [file b402126f.doc]

Figure S1. Energy-dispersive X-ray spectrum of nanotubes and vesicles showing the presence of platinum. Cu peaks are from the copper of the TEM grid.

Figure S2. Selected-area electron diffraction pattern of a peptide nanotube containing platinum nanoparticles.
